# Supplementary material for: A Controlled Trial of Long-Term Inhaled Hypertonic Saline in Patients with Cystic Fibrosis
Source: Atypon-hosted journal article supplement (doi:10.1056/nejmoa043900), 2006-01-18
Supplement: nejm_elkins_229sa1.pdf [file nejm_elkins_229sa1.pdf]

## Supplementary Appendix

This appendix has been provided by the authors to give readers additional information about their work.

Supplement to: Elkins MR, Robinson M, Rose BR, et al. A controlled trial of long-term inhaled hypertonic saline in patients with cystic fibrosis. *N Engl J Med* 2006;354:229-40.

**Table 4. Baseline QOL Domain data of the 164 Study Participants \***

| <b>QOL Tool</b> | <b>Domain</b>     | <b>Normal Saline<br/>(N = 81)</b> | <b>Hypertonic Saline<br/>(N = 83)</b> |
|-----------------|-------------------|-----------------------------------|---------------------------------------|
| SF-36           | Physical function | 85 ± 16                           | 86 ± 12                               |
|                 | Role -physical    | 64 ± 40                           | 75 ± 34                               |
|                 | Bodily pain       | 74 ± 22                           | 81 ± 18                               |
|                 | General health    | 44 ± 18                           | 46 ± 21                               |
|                 | Vitality          | 60 ± 20                           | 62 ± 20                               |
|                 | Social function   | 79 ± 23                           | 79 ± 20                               |
|                 | Role -emotional   | 88 ± 24                           | 88 ± 24                               |
|                 | Mental health     | 78 ± 12                           | 78 ± 13                               |
| CFQ Adult       | Physical          | 72 ± 22                           | 72 ± 18                               |
|                 | Role              | 83 ± 24                           | 84 ± 18                               |
|                 | Vitality          | 60 ± 19                           | 61 ± 16                               |
|                 | Emotional         | 76 ± 14                           | 77 ± 16                               |
|                 | Social            | 70 ± 20                           | 74 ± 15                               |
|                 | Body              | 78 ± 25                           | 79 ± 25                               |
|                 | Eating            | 83 ± 23                           | 86 ± 25                               |
|                 | Burden            | 58 ± 22                           | 62 ± 17                               |
|                 | Health            | 66 ± 18                           | 67 ± 19                               |
|                 | Weight            | 68 ± 37                           | 69 ± 32                               |
|                 | Respiratory       | 65 ± 17                           | 65 ± 16                               |
|                 | Digestion         | 85 ± 14                           | 83 ± 14                               |
|                 | CFQ Parent        | Physical                          | 82 ± 15                               |
| Vitality        |                   | 64 ± 16                           | 74 ± 11                               |
| Emotional       |                   | 79 ± 16                           | 86 ± 13                               |
| Body            |                   | 66 ± 26                           | 78 ± 22                               |
| School          |                   | 69 ± 24                           | 72 ± 25                               |
| Eating          |                   | 68 ± 30                           | 70 ± 27                               |
| Burden          |                   | 55 ± 8                            | 59 ± 7                                |
| Health          |                   | 78 ± 14                           | 80 ± 14                               |
| Weight          |                   | 61 ± 38                           | 61 ± 38                               |
| Respiratory     |                   | 73 ± 11                           | 80 ± 11                               |
| Digestion       | 72 ± 21           | 76 ± 15                           |                                       |

\* Plus-minus values are means ± SD. Baseline refers to the mean of the screening day and baseline day values. SF-36 = Short Form 36. CFQ = Cystic Fibrosis Questionnaire.

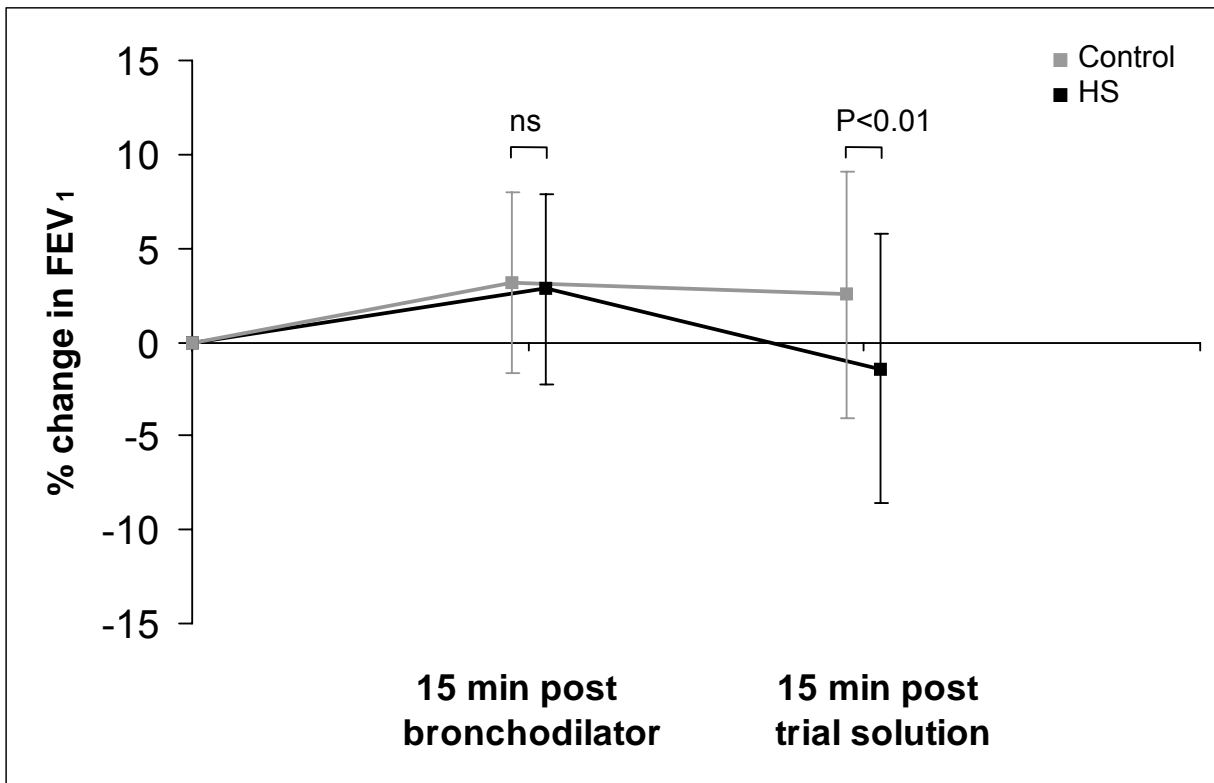

**Figure 5. Percentage Change in FEV<sub>1</sub> from Baseline to 15 Minutes After Bronchodilator and 15 Minutes After Initial Dose of Allocated Trial Solution.** Data points represent means and error bars represent standard deviations.

**Table 5. Percentage of prescribed doses taken per quarter, determined by ampoule counts.**

|           | NS group |         |         |         | HS group |         |         |         |
|-----------|----------|---------|---------|---------|----------|---------|---------|---------|
|           | 0-12     | 13-24   | 25-36   | 37-48   | 0-12     | 13-24   | 25-36   | 37-48   |
| Weeks     | 0-12     | 13-24   | 25-36   | 37-48   | 0-12     | 13-24   | 25-36   | 37-48   |
| mean ± SD | 73 ± 27  | 63 ± 34 | 63 ± 33 | 62 ± 36 | 72 ± 29  | 66 ± 33 | 61 ± 37 | 60 ± 38 |
